# Supplementary material for: Assessing the Variations in Breast/Ovarian Cancer Risk for Chinese BRCA1/2 Carriers
Source: Hindawi journal article supplement (doi:10.1155/2022/9390539), 2022-03-26
Supplement: f1 [file 9390539.f1.zip]

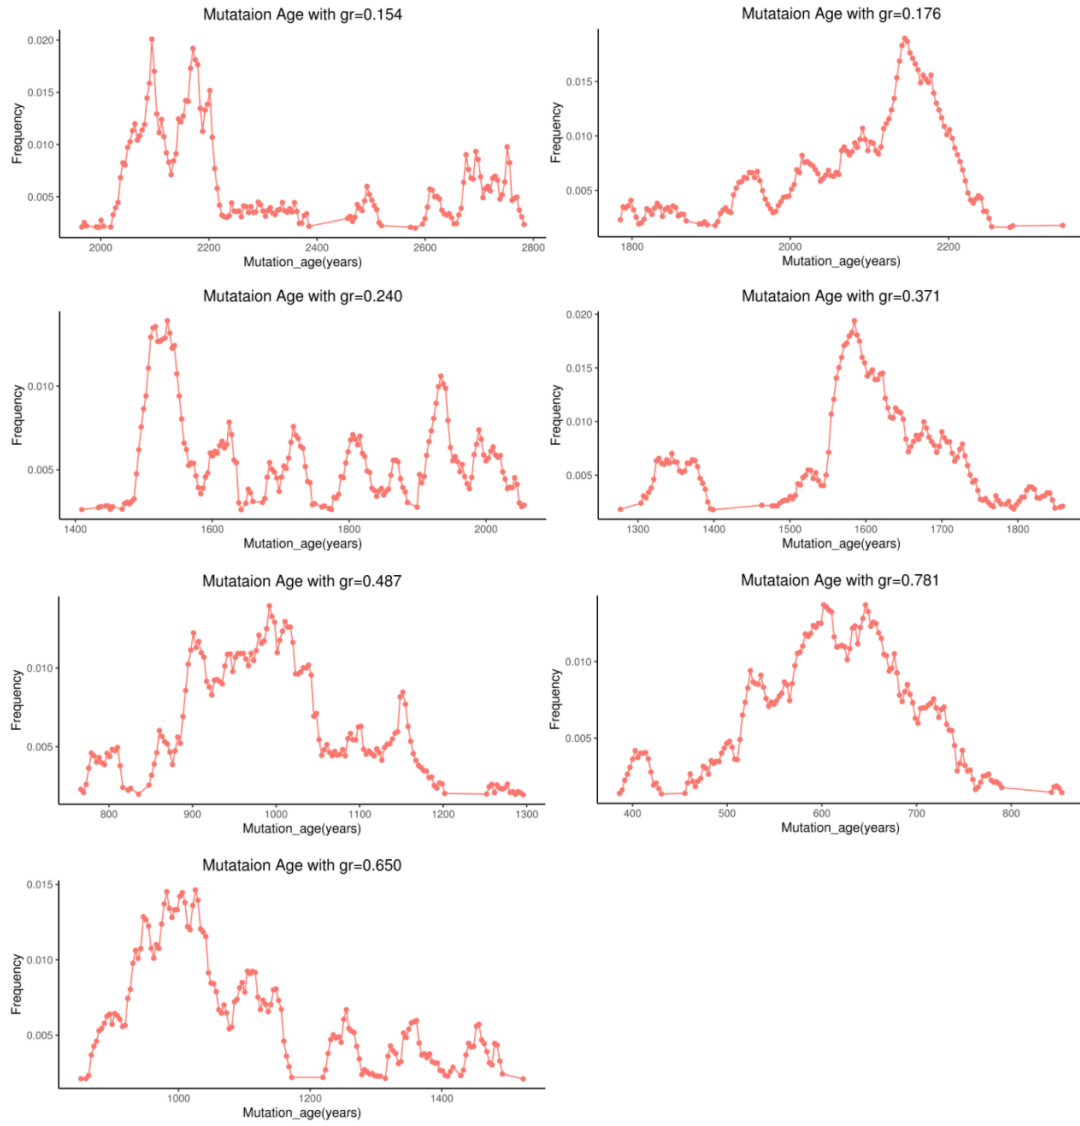

**Figure S2.** Age estimation of BRCA1:c.5470\_5477del. Seven different growth rates (gr, %) were used together with the haplotype profiles as input to DMLE+2.3, and a distribution of mutation age vs probability (frequency) was estimated for each simulation. Highest probability was achieved at gr = 0.154%, for which the estimated mutation age was 2090 years.
