# Supplementary material for: Assessing the Variations in Breast/Ovarian Cancer Risk for Chinese BRCA1/2 Carriers
Source: Hindawi journal article supplement (doi:10.1155/2022/9390539), 2022-03-26
Supplement: f1 [file 9390539.f1.zip]

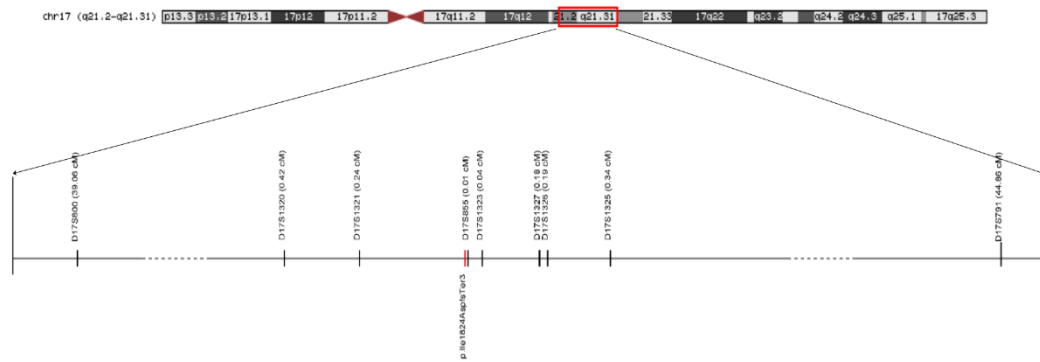

**Figure S1.** Genetic map of the nine STR markers used in the haplotype analysis of BRCA1:c.5470\_5477del (p.Ile1824AspfsTer3).
